# Supplementary material for: Evaluation of the Antifungal Activity of Endophytic and Rhizospheric Bacteria against Grapevine Trunk Pathogens
Source: MDPI journal article supplement (doi:10.3390/microorganisms10102035), 2022-10-14
Supplement: s1 [file s1]

**Table S2.** GenBank accession numbers of strains used for phylogenetic analyses of *Pseudomonas* spp. and *Serratia* spp. Sequences generated on this study are highlighted in bold.

| Species                                                    | Strain                   | 16S rRNA        |
|------------------------------------------------------------|--------------------------|-----------------|
| <i>Pseudomonas aeruginosa</i>                              | LMG 1242 <sup>T</sup>    | Z76651          |
| <i>Pseudomonas brassicacearum</i>                          | DBK11 <sup>T</sup>       | NR_024950       |
| <i>Pseudomonas chlororaphis</i> subsp. <i>aurantiaca</i>   | NCIB 10068 <sup>T</sup>  | DQ682655        |
| <i>Pseudomonas chlororaphis</i> subsp. <i>aureofaciens</i> | DSM 6698 <sup>T</sup>    | AB680099        |
| <i>Pseudomonas chlororaphis</i> subsp. <i>chlororaphis</i> | DSM 50083 <sup>T</sup>   | KX186940        |
| <i>Pseudomonas chlororaphis</i> subsp. <i>piscium</i>      | JF3835 <sup>T</sup>      | FJ168539        |
| <i>Pseudomonas chlororaphis</i>                            | <b>UCD10653</b>          | <b>OP550072</b> |
| <i>Pseudomonas chlororaphis</i>                            | <b>UCD10746</b>          | <b>OP550078</b> |
| <i>Pseudomonas chlororaphis</i>                            | <b>UCD10748</b>          | <b>OP550079</b> |
| <i>Pseudomonas chlororaphis</i>                            | <b>UCD10757</b>          | <b>OP550080</b> |
| <i>Pseudomonas chlororaphis</i>                            | <b>UCD10763</b>          | <b>OP550083</b> |
| <i>Pseudomonas donghuensis</i>                             | HYS <sup>T</sup>         | NR_136501       |
| <i>Pseudomonas donghuensis</i>                             | <b>UCD10759</b>          | <b>OP550081</b> |
| <i>Pseudomonas granadensis</i>                             | F-278,770 <sup>T</sup>   | HG764746        |
| <i>Pseudomonas granadensis</i>                             | <b>UCD10729</b>          | <b>OP550074</b> |
| <i>Pseudomonas koreensis</i>                               | Ps 9-14 <sup>T</sup>     | NR_025228       |
| <i>Pseudomonas koreensis</i>                               | <b>UCD10732</b>          | <b>OP550075</b> |
| <i>Pseudomonas</i> cf. <i>koreensis</i>                    | <b>UCD10666</b>          | <b>OP550073</b> |
| <i>Pseudomonas</i> cf. <i>koreensis</i>                    | <b>UCD10738</b>          | <b>OP550076</b> |
| <i>Pseudomonas</i> cf. <i>koreensis</i>                    | <b>UCD10739</b>          | <b>OP550077</b> |
| <i>Pseudomonas kribbensis</i>                              | 46-2 <sup>T</sup>        | KT321658        |
| <i>Pseudomonas monteilii</i>                               | CIP 104883 <sup>T</sup>  | AF064458        |
| <i>Pseudomonas plecoglossicida</i>                         | NBRC 103162 <sup>T</sup> | BBIV01000080    |
| <i>Pseudomonas</i> cf. <i>plecoglossicida</i>              | <b>UCD10762</b>          | <b>OP550082</b> |
| <i>Pseudomonas putida</i>                                  | NBRC 14164 <sup>T</sup>  | NR_113651       |
| <i>Pseudomonas reinekei</i>                                | MT1 <sup>T</sup>         | AM293565        |
| <i>Pseudomonas taiwanensis</i>                             | BCRC 17751 <sup>T</sup>  | EU103629        |
| <i>Pseudomonas oranovensis</i>                             | CCM 7279 <sup>T</sup>    | AY970951        |
| <i>Serratia entomophila</i>                                | DSM 12358 <sup>T</sup>   | NR_025338       |
| <i>Serratia ficaria</i>                                    | DSM 4569 <sup>T</sup>    | A5233428        |
| <i>Serratia marcescens</i>                                 | DSM 30121                | AJ233431        |
| <i>Serratia odorifera</i>                                  | DSM 4582 <sup>T</sup>    | A5233432        |
| <i>Serratia plymuthica</i>                                 | DSM 4540 <sup>T</sup>    | NR_114579       |
| <i>Serratia plymuthica</i>                                 | DSM 49                   | AF286871        |
| <i>Serratia plymuthica</i>                                 | CKQ9                     | OP035846        |
| <i>Serratia plymuthica</i>                                 | CTB4                     | OP102591        |
| <i>Serratia plymuthica</i>                                 | KAR18                    | KR054980        |
| <i>Serratia plymuthica</i>                                 | PR                       | ON337524        |
| <i>Serratia plymuthica</i>                                 | <b>UCD10719</b>          | <b>OP550084</b> |
| <i>Serratia plymuthica</i>                                 | <b>UCD10756</b>          | <b>OP550085</b> |
| <i>Serratia proteamaculans</i>                             | DSM 4543 <sup>T</sup>    | NR_025341       |
| <i>Serratia quinivorans</i>                                | DSM 4597 <sup>T</sup>    | NR_037112       |
