# Supplementary material for: Evaluation of the Antifungal Activity of Endophytic and Rhizospheric Bacteria against Grapevine Trunk Pathogens
Source: MDPI journal article supplement (doi:10.3390/microorganisms10102035), 2022-10-14
Supplement: s1 [file s1]

**Table S1.** GenBank accession numbers of strains used for phylogenetic analysis of the *Bacillus subtilis* species complex. Sequences generated on this study are highlighted in bold.

| Species                           | Strain                    | 16S rRNA            | <i>gyrA</i>           | <i>rpoB</i>              | <i>polC</i>                | <i>purH</i>              | <i>groEL</i>             |
|-----------------------------------|---------------------------|---------------------|-----------------------|--------------------------|----------------------------|--------------------------|--------------------------|
| <i>Bacillus amyloliquefaciens</i> | ATCC 23350 <sup>T</sup>   | NR_118950           | FN597644:7010-9469    | FN597644:122979-126560   | FN597644:1728311-1732624   | FN597644:668235-669773   | FN597644:572972-574606   |
| <i>Bacillus atrophaeus</i>        | NRS-213 <sup>T</sup>      | NR_116190           | EF026731              | EU138861                 | EU138723                   | EU138792                 | EU138585                 |
| <i>Bacillus cereus</i>            | ATCC 14579 <sup>T</sup>   | NR_074540           | CP034551:6195-8666    | CP034551:113629-117162   | CP034551:139550-140494     | CP034551:308734-310269   | CP034551:257545-259179   |
| <i>Bacillus inaquosorum</i>       | NRRL B-23052 <sup>T</sup> | KT989848            | GQ488737              | EU138812                 | EU138674                   | EU138743                 | EU138536                 |
| <i>Bacillus licheniformis</i>     | ATCC 14580 <sup>T</sup>   | X68416              | AE017333:6900-9368    | AE017333:120755-124336   | AE017333:1832492-1836808   | AE017333:707082-708620   | AE017333:626726-628360   |
| <i>Bacillus mojavensis</i>        | NRRL B-14698 <sup>T</sup> | AB021191            | EU138598              | EU138805                 | EU138667                   | EU138736                 | EU138529                 |
| <i>Bacillus nakamurai</i>         | NRRL B-41091 <sup>T</sup> | LSAZ01000028        | LSAZ01000005:218-2686 | LSAZ01000009:20722-24303 | LSAZ01000041:267992-272305 | LSAZ01000023:39384-40922 | LSAZ01000021:7656-9290   |
| <i>Bacillus pumilus</i>           | NRRL NRS-272 <sup>T</sup> | NR_116191           | EU138655              | EU138862                 | EU138724                   | EU138793                 | EU138586                 |
| <i>Bacillus siamensis</i>         | KCTC 13613 <sup>T</sup>   | MN176482            | AJVF01000039:264-2723 | KC608574                 | AJVF01000013:140847-144185 | AJVF01000023:36481-38019 | AJVF01000023:98236-99870 |
| <i>Bacillus sonorensis</i>        | NRRL B-23154 <sup>T</sup> | AF302118            | EU138611              | EU138818                 | EU138680                   | EU138749                 | EU138542                 |
| <i>Bacillus spizizenii</i>        | NRRL B-14472 <sup>T</sup> | CP002183:9750-11308 | EF134424              | CP002183:116233-119814   | CP002183:1683631-1687944   | CP002183:676895-678433   | CP002183:628489-630114   |
| <i>Bacillus subtilis</i>          | NRRL NRS-744 <sup>T</sup> | NR_116192           | NC_000964:6994-9459   | NC_000964:121919-125500  | NC_000964:1727133-1731446  | NC_000964:708594-710132  | NC_000964:650234-651868  |
| <i>Bacillus tequilensis</i>       | NRRL B-41771 <sup>T</sup> | NR_104919           | EU138625              | EU138832                 | EU138694                   | EU138763                 | EU138556                 |
| <i>Bacillus vallismortis</i>      | NRRL B-14890 <sup>T</sup> | AB021198            | EU138601              | EU138808                 | EU138670                   | EU138739                 | EU138532                 |
| <i>Bacillus velezensis</i>        | NRRL B-41580 <sup>T</sup> | AY603658            | EU138622              | EU138829                 | EU138691                   | EU138760                 | EU138553                 |
| <i>Bacillus velezensis</i>        | NRRL BD-545               | -                   | EU138626              | EU138833                 | EU138695                   | EU138764                 | EU138557                 |
| <i>Bacillus velezensis</i>        | NRRL BD-568               | -                   | EU138631              | EU138838                 | EU138700                   | EU138769                 | EU138562                 |
| <i>Bacillus velezensis</i>        | NRRL BD-621               | -                   | EU138650              | EU138857                 | EU138719                   | EU138788                 | EU138581                 |
| <i>Bacillus velezensis</i>        | <b>CE100</b>              | <b>OP550064</b>     | <b>OP561954</b>       | <b>OP561962</b>          | <b>OP561970</b>            | <b>OP561978</b>          | <b>OP561986</b>          |
| <i>Bacillus velezensis</i>        | <b>UCD10598</b>           | <b>OP550065</b>     | <b>OP561955</b>       | <b>OP561963</b>          | <b>OP561971</b>            | <b>OP561979</b>          | <b>OP561987</b>          |
| <i>Bacillus velezensis</i>        | <b>UCD10599</b>           | <b>OP550066</b>     | <b>OP561956</b>       | <b>OP561964</b>          | <b>OP561972</b>            | <b>OP561980</b>          | <b>OP561988</b>          |
| <i>Bacillus velezensis</i>        | <b>UCD10600</b>           | <b>OP550067</b>     | <b>OP561957</b>       | <b>OP561965</b>          | <b>OP561973</b>            | <b>OP561981</b>          | <b>OP561989</b>          |
| <i>Bacillus velezensis</i>        | <b>UCD10607</b>           | <b>OP550068</b>     | <b>OP561958</b>       | <b>OP561966</b>          | <b>OP561974</b>            | <b>OP561982</b>          | <b>OP561990</b>          |
| <i>Bacillus velezensis</i>        | <b>UCD10613</b>           | <b>OP550069</b>     | <b>OP561959</b>       | <b>OP561967</b>          | <b>OP561975</b>            | <b>OP561983</b>          | <b>OP561991</b>          |
| <i>Bacillus velezensis</i>        | <b>UCD10614</b>           | <b>OP550070</b>     | <b>OP561960</b>       | <b>OP561968</b>          | <b>OP561976</b>            | <b>OP561984</b>          | <b>OP561992</b>          |
| <i>Bacillus velezensis</i>        | <b>UCD10631</b>           | <b>OP550071</b>     | <b>OP561961</b>       | <b>OP561969</b>          | <b>OP561977</b>            | <b>OP561985</b>          | <b>OP561993</b>          |
